# Supplementary material
Source: PubMed Central journal article supplement (PMC4893996)

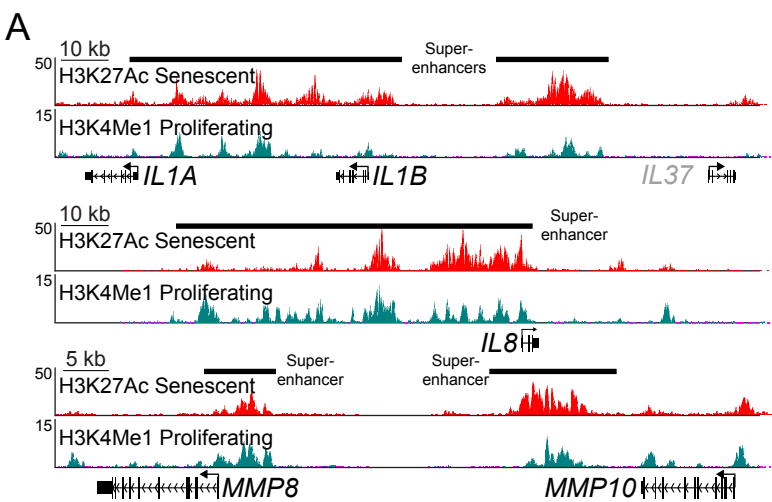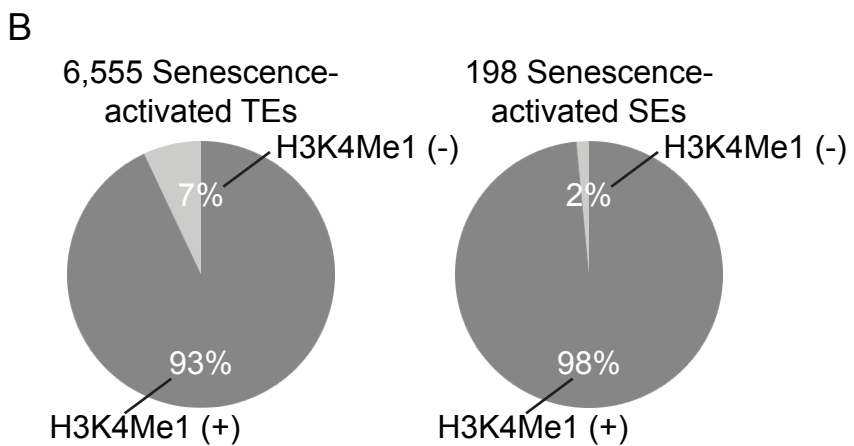

A

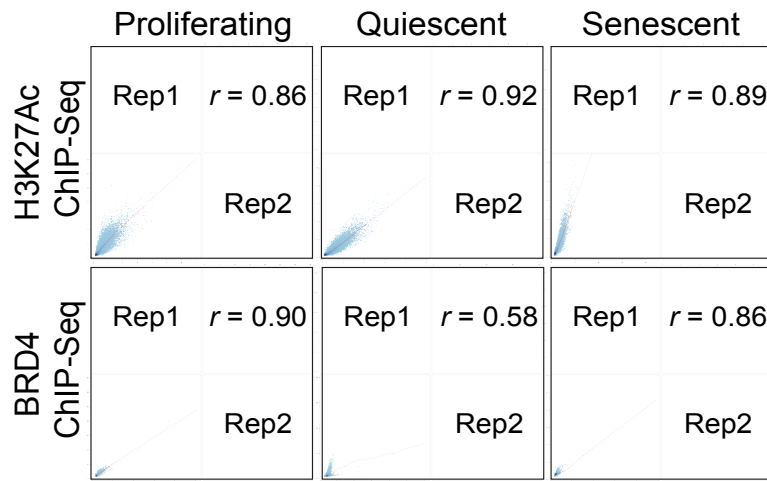

B

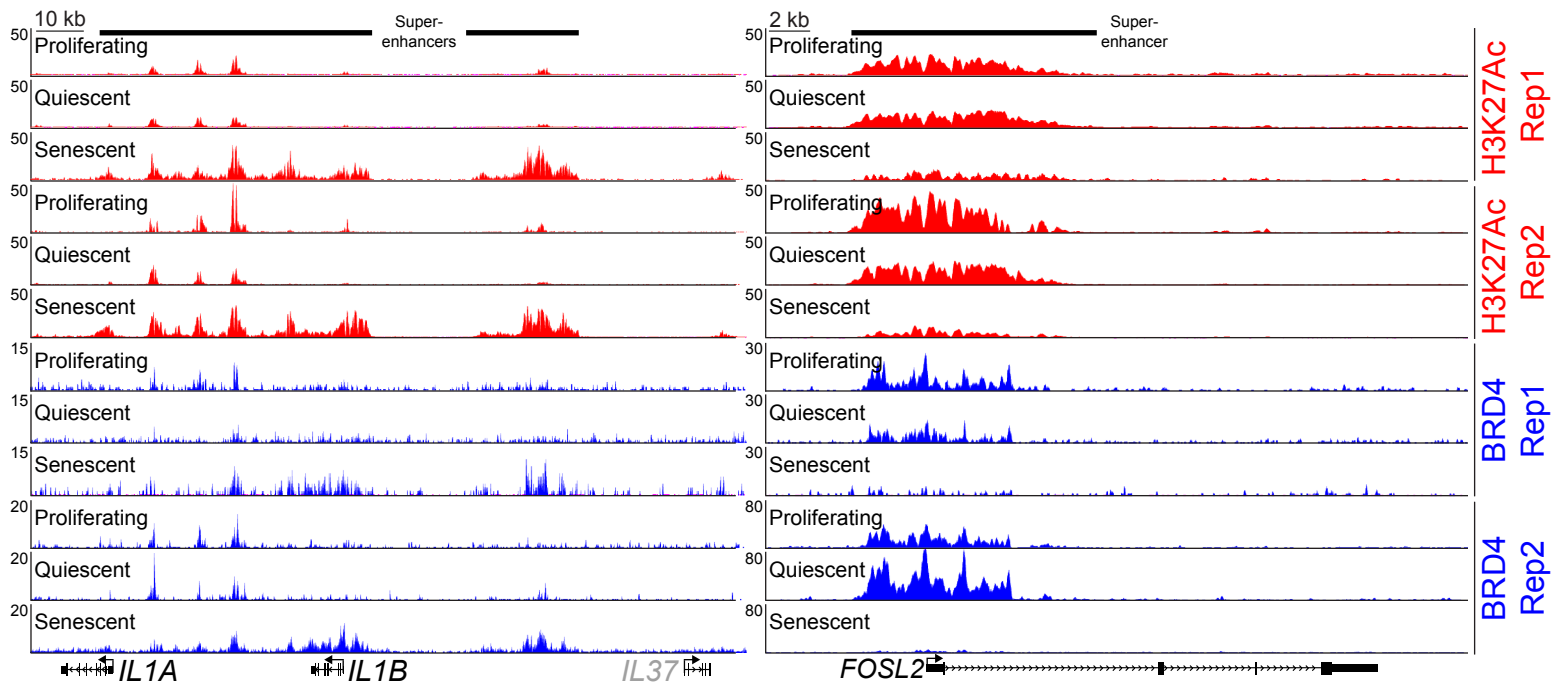

C

| Samples               | Replicates | Raw reads counts | Mapped reads counts | % Mapped reads |
|-----------------------|------------|------------------|---------------------|----------------|
| H3K27Ac Proliferating | Rep1       | 132,494,863      | 109,247,758         | 82.45 %        |
| H3K27Ac Proliferating | Rep2       | 32,276,586       | 26,594,147          | 82.39 %        |
| H3K27Ac Quiescent     | Rep1       | 156,675,474      | 131,943,595         | 84.21 %        |
| H3K27Ac Quiescent     | Rep2       | 52,104,982       | 44,817,586          | 86.01 %        |
| H3K27Ac Senescent     | Rep1       | 71,103,597       | 53,392,195          | 75.09 %        |
| H3K27Ac Senescent     | Rep2       | 93,309,321       | 78,634,297          | 84.27 %        |
| BRD4 Proliferating    | Rep1       | 101,602,170      | 69,212,449          | 68.12 %        |
| BRD4 Proliferating    | Rep2       | 55,420,366       | 40,124,330          | 72.40 %        |
| BRD4 Quiescent        | Rep1       | 130,465,727      | 85,692,248          | 65.68 %        |
| BRD4 Quiescent        | Rep2       | 35,434,821       | 27,237,451          | 76.87 %        |
| BRD4 Senescent        | Rep1       | 107,334,951      | 66,423,458          | 61.88 %        |
| BRD4 Senescent        | Rep2       | 80,938,196       | 58,741,764          | 72.58 %        |

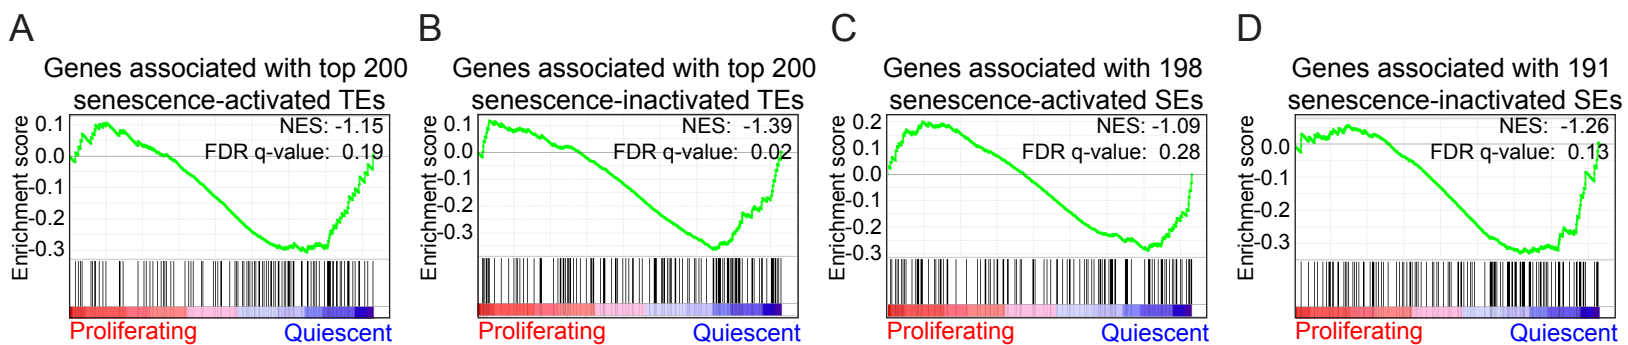

**E Senescence-activated typical enhancers**

|                                      |                           |
|--------------------------------------|---------------------------|
| Negative regulation of MAPK activity | DUSP4, SPRY2, NF1, SPRED1 |
| TLR1/2/6 signaling pathway           | TLR1, TLR2, IRAK2, TAB2   |
| TLR5/10 signaling pathway            | TLR5, TLR10, RIPK2, MYD88 |

**Senescence-inactivated typical enhancers**

|                                   |                             |
|-----------------------------------|-----------------------------|
| DNA strand elongation/replication | MCM6, POLA1, RPA3, PCNA     |
| Telomere maintenance              | RFC3, LIG1, FEN1, PRIM1     |
| Chromosome localization           | CENPE, CENPF, KATNB1, CCNB1 |

**F HALLMARK\_E2F\_TARGETS**

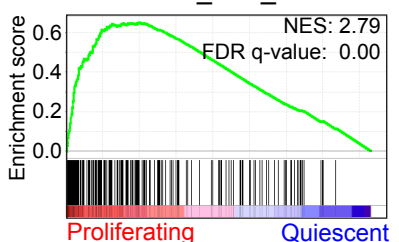

**G HALLMARK\_E2F\_TARGETS**

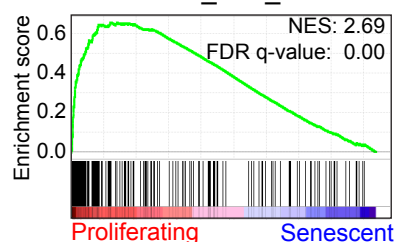

**H E2F targets-associated typical-enhancers**

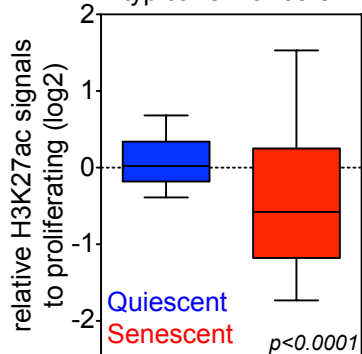

**I E2F targets-associated super-enhancers**

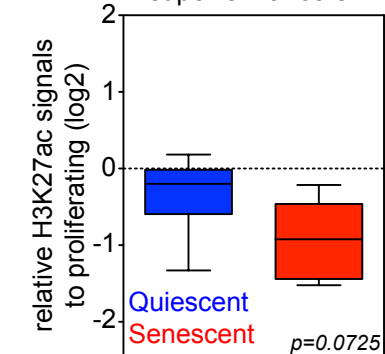

**J Quiescence vs Senescence associated genes**

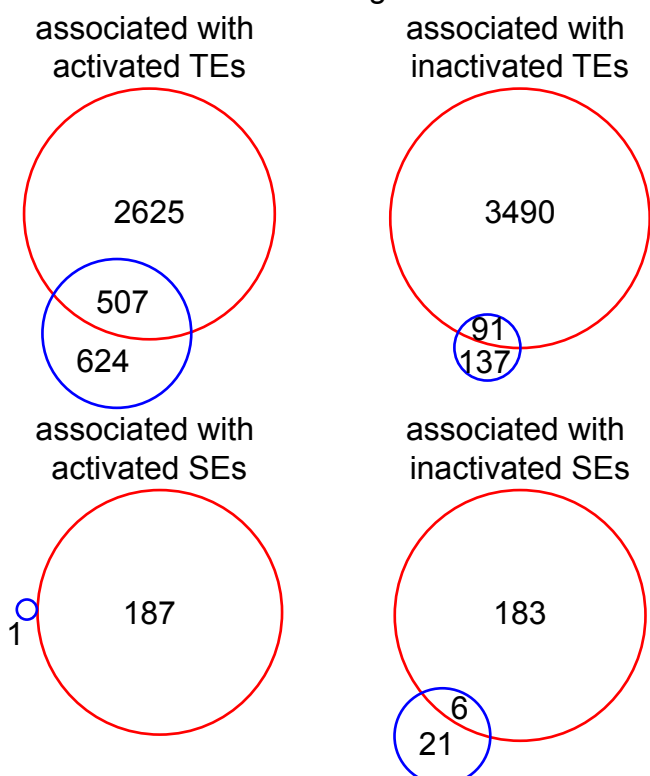

**K Senescence-activated super enhancers**

|                           |                                 |
|---------------------------|---------------------------------|
| Cytokine activity         | IL-1A, IL-1B, IL-8, IFNE, INHBA |
| Growth factor activity    | HGF, EREG, FGF18, FGF20, VEGFC  |
| Receptor binding          | AREG, TGBR2, PIK3R1, ERBB4      |
| Cytokine receptor binding | TGFB2, CSF2, BMP2               |

**Senescence-inactivated super enhancers**

|                                           |                     |
|-------------------------------------------|---------------------|
| Sequence-specific DNA binding TF activity | SDC4, THBS1, CCDC80 |
| Nucleic acid binding TF activity          | CRIM1, CTGF         |
| Fibronectin binding                       | IGF1R, TGFBR1       |

A

| BRD4 signature genes              |                                       |
|-----------------------------------|---------------------------------------|
| Inflammatory response             | IL-1A, IL-1B, IL-6, IL-8, CXCL1, CSF2 |
| TNFA signaling via NF- $\kappa$ B | VEGFA, AREG, INHBA, SERPINB2, BMP2    |
| H-RAS oncogenic signature         | DUSP4, FLRT3, LYN, EREG, TGFA, CCL20  |

B

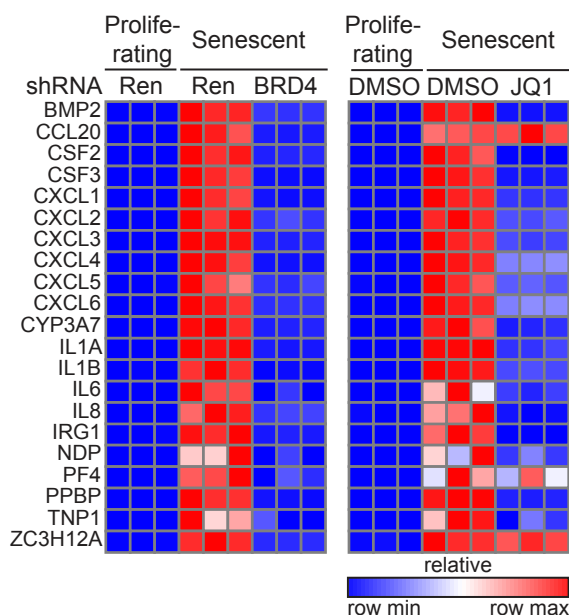

C

BRD4 and p65 commonly regulated genes

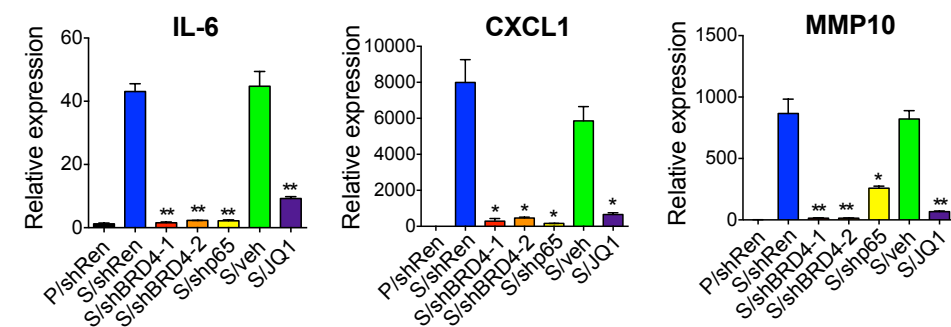

D

BRD4 uniquely regulated genes

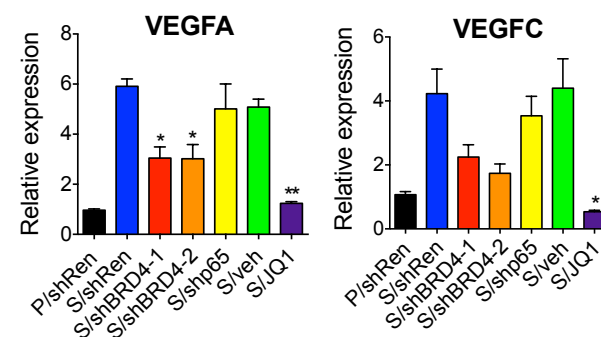

E

BJ Ras

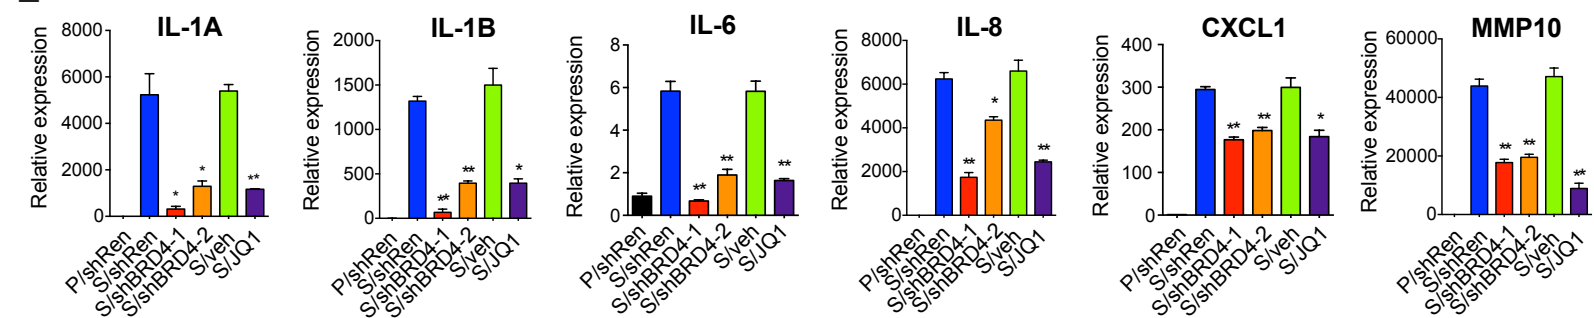

F

W138 Ras

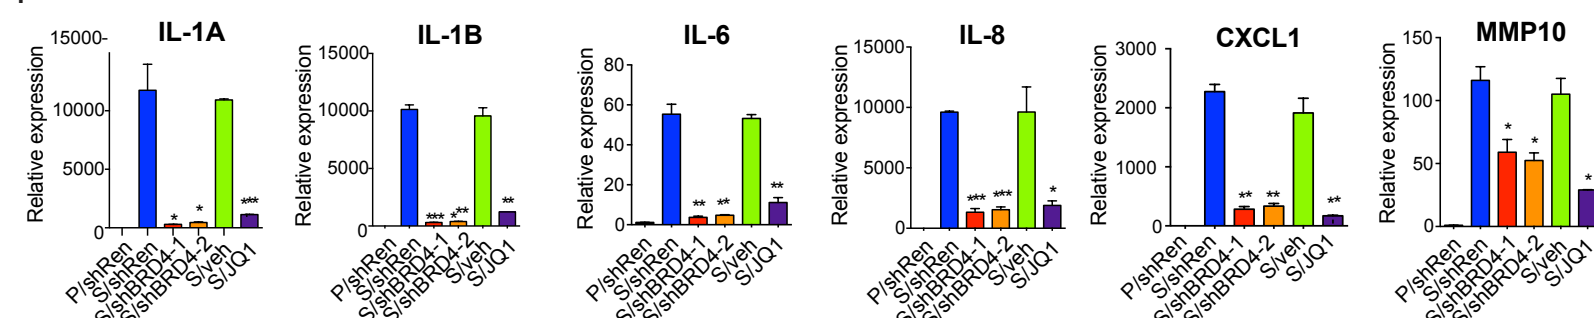

A

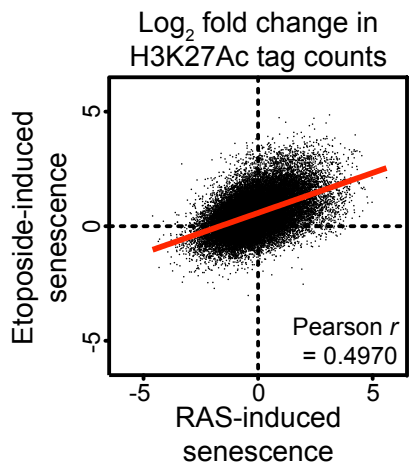

B

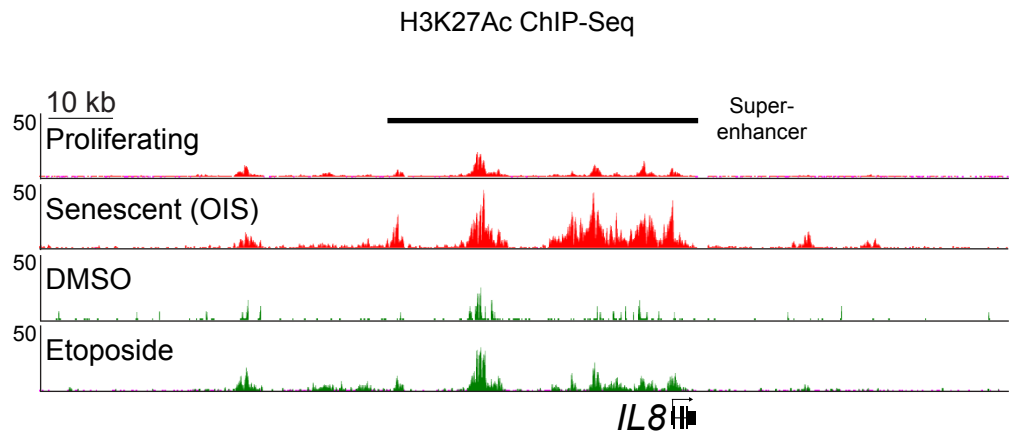

C

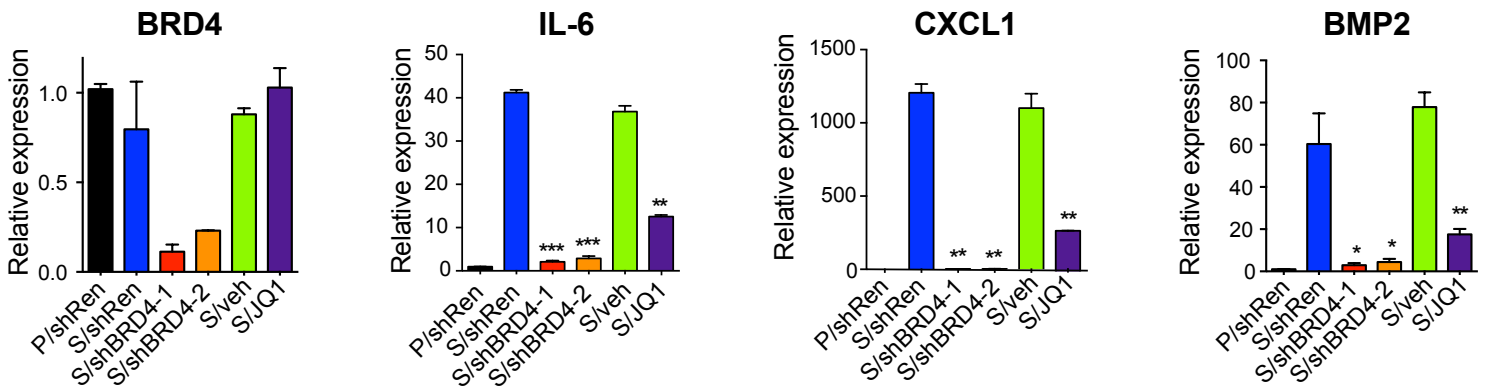

A

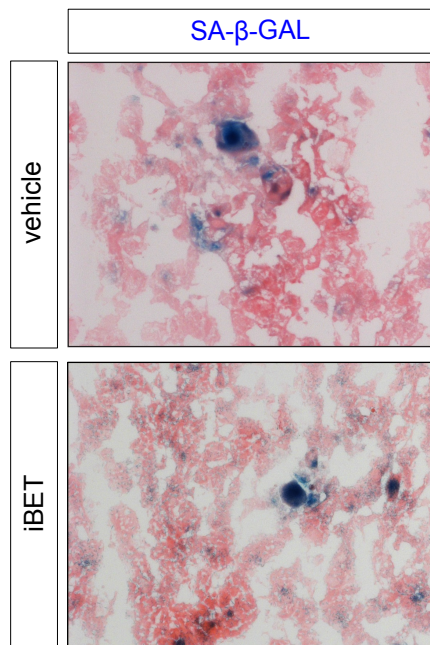

B

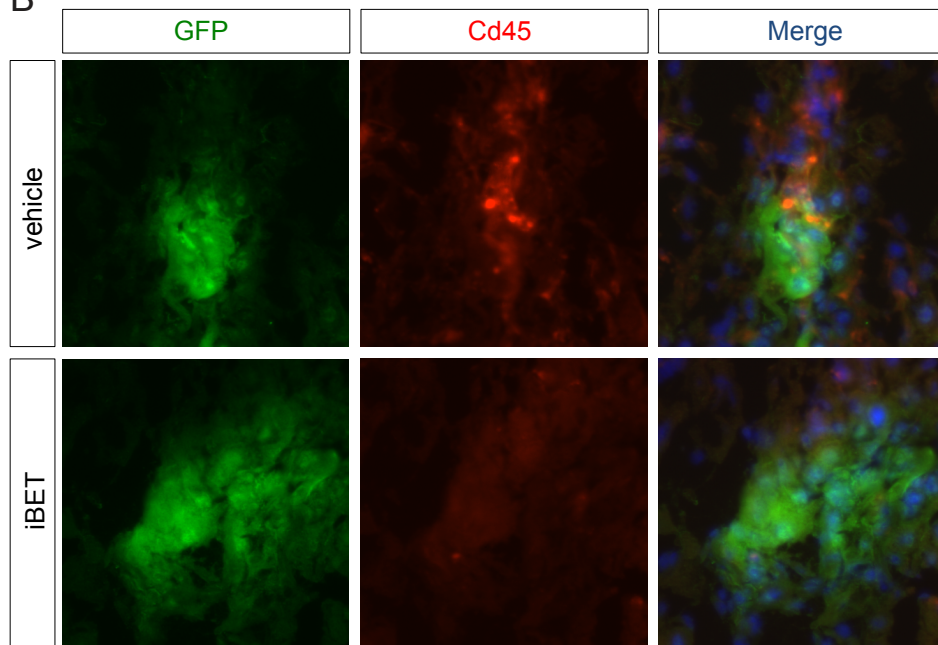

C

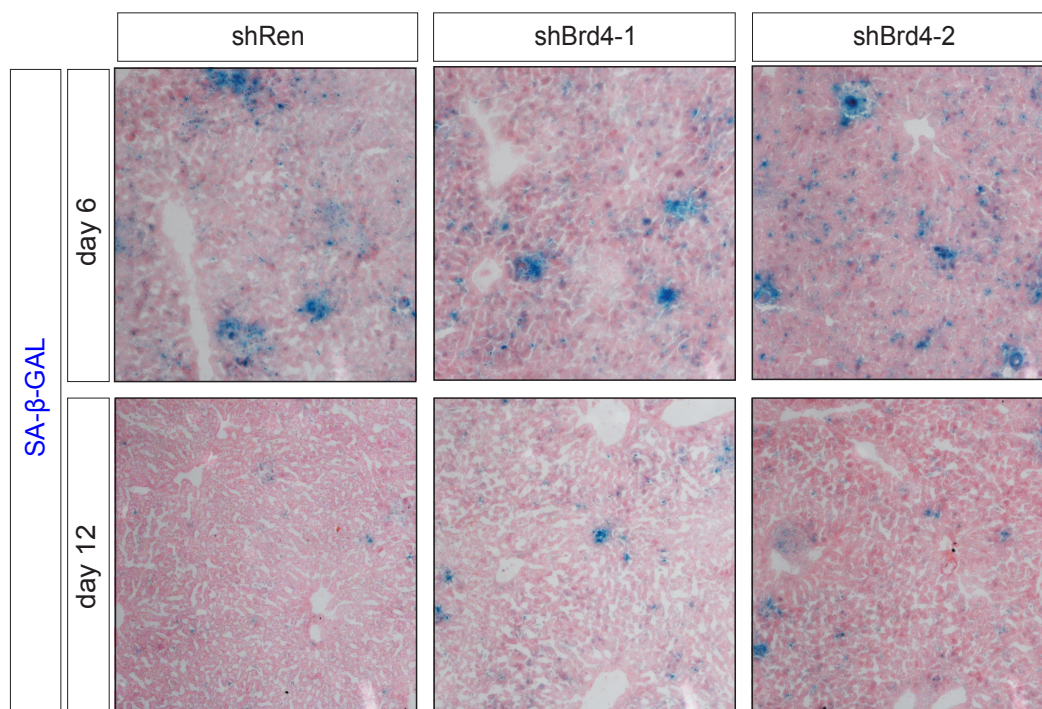

Supplement: NIHMS781488-supplement-2.pdf [file NIHMS781488-supplement-2.pdf]
